# Supplementary material
Source: MDPI journal article supplement (https://www.mdpi.com/2071-1050/15/4/3505)
Supplement: s1 [file s1 › sustainability-2108639-supplementary.pdf]

*Review*

# **Material Flow Analysis in WEEE Management for Circular Economy: A Content Review on Applications, Limitations and Future Outlook**

**Dhiya Durani Sofian Azizi <sup>1</sup>, Marlia M. Hanafiah <sup>1,2,\*</sup> and Kok Sin Woon<sup>3</sup>**

<sup>1</sup> Department of Earth Science and Environment, Faculty of Science and Technology, Universiti Kebangsaan Malaysia, 43600 UKM Bangi, Selangor Malaysia

<sup>2</sup> Centre for Tropical Climate Change system, Institute of Climate Change, Universiti Kebangsaan Malaysia, 43600 UKM Bangi, Selangor Malaysia

<sup>3</sup> New Energy Science and Engineering Department, School of Energy and Chemical Engineering, Xiamen University Malaysia, 43900 Sepang, Selangor

<sup>4</sup> School of Technology Management and Logistics, College of Business, Universiti Utara Malaysia, 06010 Sintok, Kedah, Malaysia

\* Correspondence: mhmarlia@ukm.edu.my

## **Content**

**Table S1** Summary of existing studies

**Table S2** Waste from Electrical and Electronic Equipment (WEEE directive)

**Table S1**

Selected of existing study

| No | Preferen<br>ces | Continent | Economic<br>status of<br>the<br>country | Year | Publisher                                                | E-waste category                                                      |                      | Aspect evaluated                                                                                                                                                       | Sustainability<br>dimension              | MFA<br>application in<br>e-waste<br>management |        |        |
|----|-----------------|-----------|-----------------------------------------|------|----------------------------------------------------------|-----------------------------------------------------------------------|----------------------|------------------------------------------------------------------------------------------------------------------------------------------------------------------------|------------------------------------------|------------------------------------------------|--------|--------|
|    |                 |           |                                         |      |                                                          |                                                                       |                      |                                                                                                                                                                        |                                          | M<br>1                                         | M<br>2 | M<br>3 |
| 1. | [45]            | Asia      | OECD                                    | 2010 | Journal of<br>Material Cycles<br>and Waste<br>Management | Waste<br>Electrical<br>Electronic<br>Equipment<br>(WEEE<br>Directive) | from<br>and          | <ul style="list-style-type: none"> <li>Product level<br/>assessment</li> <li>E-waste<br/>management<sup>c</sup></li> </ul>                                             | Economic and<br>environmental            | •                                              | •      | •      |
| 2. | [41]            | Asia      | Non-<br>OECD                            | 2010 | Environmental<br>Science and<br>Technology               | Specific<br>appliances<br>Computer)                                   | electrical<br>(e.g., | <ul style="list-style-type: none"> <li>Geographical<br/>level assessment</li> <li>Environmental<br/>impact<br/>assessment</li> <li>Uncertainty<br/>analysis</li> </ul> | Economic,<br>social and<br>environmental | •                                              |        |        |
| 3. | [46]            | America   | OECD                                    | 2010 | Waste<br>Management                                      | Specific<br>appliances<br>Computer)                                   | electrical<br>(e.g., | <ul style="list-style-type: none"> <li>Consumer<br/>behaviour</li> </ul>                                                                                               | Social and<br>environmental              | •                                              |        | •      |
| 4. | [47]            | Asia      | Non-<br>OECD                            | 2010 | Waste<br>Management                                      | Waste<br>Electrical<br>Electronic<br>Equipment<br>(WEEE<br>Directive) | from<br>and          | <ul style="list-style-type: none"> <li>Product level<br/>assessment</li> <li>Material level<br/>assessment</li> <li>Geographical<br/>level assessment</li> </ul>       | Economic,<br>social and<br>environmental | •                                              |        | •      |
| 5. | [48]            | Europe    | OECD                                    | 2011 | Waste<br>Management<br>and Research                      | Waste<br>Electrical<br>Electronic                                     | from<br>and          | <ul style="list-style-type: none"> <li>E-waste<br/>management</li> </ul>                                                                                               | Economic,<br>social and<br>environmental |                                                | •      | •      |

|     |      |         |          |      |                                      |                                                        |            |                                                                                                                                                       |                                    |  |   |   |
|-----|------|---------|----------|------|--------------------------------------|--------------------------------------------------------|------------|-------------------------------------------------------------------------------------------------------------------------------------------------------|------------------------------------|--|---|---|
|     |      |         |          |      |                                      | Equipment (WEEE Directive)                             |            | <ul style="list-style-type: none"> <li>• Product level assessment</li> <li>• Consumer behaviour</li> </ul>                                            |                                    |  |   |   |
| 6.  | [43] | Asia    | Non-OECD | 2011 | Resource, Conservation and Recycling | Various appliances                                     | electrical | <ul style="list-style-type: none"> <li>• Product level assessment</li> <li>• Uncertainty analysis</li> </ul>                                          | Economic and environmental         |  | • | • |
| 7.  | [49] | America | OECD     | 2012 | Resource, Conservation and Recycling | Waste Electrical Electronic Equipment (WEEE Directive) | from and   | <ul style="list-style-type: none"> <li>• Consumer behaviour</li> <li>• Product level assessment</li> <li>• Uncertainty analysis</li> </ul>            | Economic, social and environmental |  | • | • |
| 8.  | [50] | Asia    | Non-OECD | 2012 | Ecological engineering               | Various appliances                                     | electrical | <ul style="list-style-type: none"> <li>• Product level assessment</li> <li>• E-waste management <sup>c</sup></li> </ul>                               | Economic and environmental         |  | • | • |
| 9.  | [51] | Asia    | Non-OECD | 2012 | Journal of Cleaner Production        | Waste Electrical Electronic Equipment (WEEE Directive) | from and   | <ul style="list-style-type: none"> <li>• Product level assessment</li> <li>• E-waste management <sup>a</sup></li> <li>• Consumer behaviour</li> </ul> | Economic, social and environmental |  | • | • |
| 10. | [52] | Asia    | Non-OECD | 2012 | Waste Management & Research          | Various appliances                                     | electrical | <ul style="list-style-type: none"> <li>• Product level assessment</li> <li>• E-waste management <sup>c</sup></li> <li>• Consumer behaviour</li> </ul> | Economic, social and environmental |  | • | • |
| 11. | [53] | Africa  | Non-OECD | 2013 | Journal of Environmental Protection  | Waste Electrical Electronic                            | from and   | <ul style="list-style-type: none"> <li>• Consumer behaviour</li> </ul>                                                                                | Social and environmental           |  | • | • |

|     |      |                           |          |      |                                                 |                                                        |              |                                                                                                                                                                                             |                                    |   |   |   |
|-----|------|---------------------------|----------|------|-------------------------------------------------|--------------------------------------------------------|--------------|---------------------------------------------------------------------------------------------------------------------------------------------------------------------------------------------|------------------------------------|---|---|---|
|     |      |                           |          |      |                                                 | Equipment (WEEE Directive)                             |              | <ul style="list-style-type: none"> <li>• Product level assessment</li> </ul>                                                                                                                |                                    |   |   |   |
| 12. | [54] | Asia                      | Non-OECD | 2013 | Waste Management                                | Various appliances                                     | electrical   | <ul style="list-style-type: none"> <li>• Product level assessment</li> <li>• Consumer behaviour</li> </ul>                                                                                  | Social and environmental           | • | • |   |
| 13. | [55] | America                   | OECD     | 2013 | Journal of Industrial Ecology                   | Technology appliances (CRT LCD)                        | based (e.g., | <ul style="list-style-type: none"> <li>• Product level assessment</li> <li>• Material level assessment</li> <li>• Uncertainty analysis</li> </ul>                                           | Economic and environmental         | • | • |   |
| 14. | [56] | America<br>Europe<br>Asia | OECD     | 2013 | Waste Management                                | Waste Electrical Electronic Equipment (WEEE Directive) | from and     | <ul style="list-style-type: none"> <li>• Product level assessment</li> <li>• Material level assessment</li> <li>• Environmental impact assessment</li> <li>• Life cycle analysis</li> </ul> | Economic, social and environmental | • |   | • |
| 15. | [57] | Asia                      | Non-OECD | 2014 | Journal of Material Cycles and Waste Management | Various appliances                                     | electrical   | <ul style="list-style-type: none"> <li>• Consumer behaviour</li> <li>• Circular economy</li> <li>• E-waste management<sup>a</sup></li> <li>• Uncertainty analysis</li> </ul>                | Economic, social and environmental | • | • |   |
| 16. | [58] | Asia                      | Non-OECD | 2014 | Waste management                                | Various appliances                                     | electrical   | <ul style="list-style-type: none"> <li>• Product level assessment</li> <li>• Geographical level assessment</li> </ul>                                                                       | Economic, social and environmental | • | • |   |

|     |      |             |                   |      |                                                |                                                        |                   |                                                                                                                                                              |                                    |   |   |  |
|-----|------|-------------|-------------------|------|------------------------------------------------|--------------------------------------------------------|-------------------|--------------------------------------------------------------------------------------------------------------------------------------------------------------|------------------------------------|---|---|--|
|     |      |             |                   |      |                                                |                                                        |                   | <ul style="list-style-type: none"><li>• Material level assessment</li><li>• Uncertainty analysis</li></ul>                                                   |                                    |   |   |  |
| 17. | [59] | Europe      | OECD              | 2014 | Environmental Science and Technology           | Waste Electrical Electronic Equipment (WEEE Directive) | from and          | <ul style="list-style-type: none"><li>• Material level assessment</li><li>• Uncertainty analysis</li><li>• Environmental impact assessment</li></ul>         | Economic and environmental         | • | • |  |
| 18. | [60] | Asia        | Non-OECD          | 2014 | Environmental Earth Science                    | Various appliances                                     | electrical        | <ul style="list-style-type: none"><li>• E-waste management <sup>c</sup></li><li>• Geographical level assessment</li><li>• Product level assessment</li></ul> | Economic, social and environmental | • | • |  |
| 19. | [61] | America     | OECD              | 2014 | ACS Sustainable Chemistry and Engineering      | Specific appliances (Batteries)                        | electrical (e.g., | <ul style="list-style-type: none"><li>• Product level assessment</li><li>• Uncertainty analysis</li></ul>                                                    | Economic and environmental         | • | • |  |
| 20. | [62] | Europe Asia | OECD and Non-OECD | 2014 | Environmental Science and Technology           | Waste Electrical Electronic Equipment (WEEE Directive) | from and          | <ul style="list-style-type: none"><li>• Geographical level assessment</li></ul>                                                                              | Social and environmental           | • | • |  |
| 21. | [33] | Europe      | Non-OECD          | 2014 | International Journal of Life Cycle Assessment | Specific appliances (Mobile Phone)                     | electrical (e.g., | <ul style="list-style-type: none"><li>• E-waste management <sup>c</sup></li><li>• Product level assessment</li><li>• Material level assessment</li></ul>     | Economic, social and environmental | • | • |  |

|     |      |        |          |      |                                                 |                                                        |            |                                                                                                                                                                                 |                                    |   |   |   |
|-----|------|--------|----------|------|-------------------------------------------------|--------------------------------------------------------|------------|---------------------------------------------------------------------------------------------------------------------------------------------------------------------------------|------------------------------------|---|---|---|
| 22. | [63] | Asia   | OECD     | 2015 | Journal of Material Cycles and Waste Management | Various appliances                                     | electrical | <ul style="list-style-type: none"> <li>• E-waste management</li> <li>• Product level assessment</li> </ul>                                                                      | Economic and environmental         | • |   |   |
| 23. | [11] | Europe | OECD     | 2015 | Environmental Science and Technology            | Specific appliances (e.g., Computer)                   | electrical | <ul style="list-style-type: none"> <li>• Product level assessment</li> <li>• material level assessment</li> </ul>                                                               | Economic and environmental         |   | • | • |
| 24. | [35] | Asia   | Non-OECD | 2015 | Resource, Conservation and Recycling            | Various appliances                                     | electrical | <ul style="list-style-type: none"> <li>• Consumer behaviour</li> </ul>                                                                                                          | Social and environmental           |   |   | • |
| 25. | [10] | Asia   | Non-OECD | 2015 | Rare Metals                                     | Specific appliances (e.g., Laptops)                    | electrical | <ul style="list-style-type: none"> <li>• Product level assessment</li> <li>• Material level assessment</li> </ul>                                                               | Economic and environmental         | • | • |   |
| 26. | [64] | Asia   | Non-OECD | 2015 | Waste Management                                | Specific appliances (e.g., Mobile phone)               | electrical | <ul style="list-style-type: none"> <li>• Product level assessment</li> <li>• Material level assessment</li> <li>• Uncertainty analysis</li> <li>• Consumer behaviour</li> </ul> | Economic, social and environmental | • | • |   |
| 27. | [42] | Europe | OECD     | 2015 | Resource, Conservation and Recycling            | Waste Electrical Electronic Equipment (WEEE Directive) | from and   | <ul style="list-style-type: none"> <li>• Product level assessment</li> <li>• Material level assessment</li> <li>• Consumer behaviour</li> </ul>                                 | Economic, social and environmental |   | • | • |
| 28. | [65] | Europe | OECD     | 2015 | Waste Management and Research                   | Waste Electrical Electronic                            | from and   | <ul style="list-style-type: none"> <li>• E-waste management</li> <li>• Product level assessment</li> </ul>                                                                      | Economic, social and environmental | • | • | • |

|     |      |         |          |      |                                      |                                                        |                    |                                                                                                                                                                                     |                                    |   |   |   |
|-----|------|---------|----------|------|--------------------------------------|--------------------------------------------------------|--------------------|-------------------------------------------------------------------------------------------------------------------------------------------------------------------------------------|------------------------------------|---|---|---|
|     |      |         |          |      |                                      | Equipment (WEEE Directive)                             |                    | <ul style="list-style-type: none"> <li>• Material level assessment</li> </ul>                                                                                                       |                                    |   |   |   |
| 29. | [66] | Oceania | OECD     | 2016 | Journal of Cleaner Production        | Specific appliances (e.g., Mobile Phone)               | electrical (e.g.,) | <ul style="list-style-type: none"> <li>• Product level assessment</li> <li>• Geographical level assessment</li> <li>• Consumer behaviour</li> <li>• Uncertainty analysis</li> </ul> | Economic, social and environmental | • | • | • |
| 30. | [67] | Asia    | Non-OECD | 2016 | Waste Management and Research        | Waste Electrical Electronic Equipment (WEEE Directive) | from and           | <ul style="list-style-type: none"> <li>• Product level assessment</li> </ul>                                                                                                        | Economic and environmental         |   | • |   |
| 31. | [9]  | Asia    | Non-OECD | 2016 | Environmental Science and Technology | Waste Electrical Electronic Equipment (WEEE Directive) | from and           | <ul style="list-style-type: none"> <li>• Product level assessment</li> <li>• Material level assessment</li> <li>• Uncertainty analysis</li> </ul>                                   | Economic and environmental         | • | • |   |
| 32. | [68] | Europe  | OECD     | 2016 | Journal of Cleaner Production        | Specific appliances (e.g., Computer)                   | electrical (e.g.,) | <ul style="list-style-type: none"> <li>• Geographical level assessment</li> <li>• Product level assessment</li> </ul>                                                               | Social and environmental           | • | • |   |
| 33. | [69] | Asia    | OECD     | 2016 | Procedia CIRP                        | Specific appliances (e.g., Mobile phone)               | electrical (e.g.,) | <ul style="list-style-type: none"> <li>• Material level assessment</li> <li>• Product level assessment</li> <li>• Uncertainty analysis</li> </ul>                                   | Economic and environmental         | • |   | • |

|     |      |         |          |      |                                                 |                                                        |                   |                                                                                                                                                |                                    |   |   |   |
|-----|------|---------|----------|------|-------------------------------------------------|--------------------------------------------------------|-------------------|------------------------------------------------------------------------------------------------------------------------------------------------|------------------------------------|---|---|---|
| 34. | [70] | America | OECD     | 2016 | Environmental Science and Technology            | Various appliances                                     | electrical        | <ul style="list-style-type: none"> <li>• Product level assessment</li> <li>• E-waste management</li> <li>• Uncertainty analysis</li> </ul>     | Economic and environmental         | • | • | • |
| 35. | [71] | Asia    | OECD     | 2016 | Recycling                                       | Specific appliances (e.g., Mobile Phone)               | electrical (e.g., | <ul style="list-style-type: none"> <li>• Product level assessment</li> <li>• End-of-life</li> <li>• Environmental impact assessment</li> </ul> | Economic, social and environmental | • |   | • |
| 36. | [72] | Asia    | Non-OECD | 2017 | Resources policy                                | Specific appliances (e.g., Lithium-ion battery)        | electrical (e.g., | <ul style="list-style-type: none"> <li>• Product level assessment</li> <li>• Material level assessment</li> </ul>                              | Economic and environmental         | • | • | • |
| 37. | [73] | Africa  | Non-OECD | 2017 | Journal of Material Cycles and Waste Management | Specific appliances (e.g., Mobile phone)               | electrical (e.g., | <ul style="list-style-type: none"> <li>• Material level assessment</li> <li>• Product level assessment</li> <li>• Circular economy</li> </ul>  | Economic, social and environmental |   | • | • |
| 38. | [74] | Asia    | Non-OECD | 2017 | Science of the Total Environment                | Specific appliances (e.g., Mobile phone)               | electrical (e.g., | <ul style="list-style-type: none"> <li>• Material level assessment</li> </ul>                                                                  | Economic and environmental         | • |   |   |
| 39. | [34] | Europe  | OECD     | 2017 | Resource, Conservation and Recycling            | Waste Electrical Electronic Equipment (WEEE Directive) | from and          | <ul style="list-style-type: none"> <li>• Product level assessment</li> <li>• Material level assessment</li> </ul>                              | Economic and environmental         | • |   |   |

|     |      |      |          |      |                                                                                |                                                        |                        |                                                                                           |                                    |   |   |
|-----|------|------|----------|------|--------------------------------------------------------------------------------|--------------------------------------------------------|------------------------|-------------------------------------------------------------------------------------------|------------------------------------|---|---|
| 40. | [75] | Asia | Non-OECD | 2017 | Resource, Conservation and Recycling                                           | Specific appliances (e.g., Lithium electric car)       | electrical (e.g., form | • Product level assessment                                                                | Economic and environmental         | • | • |
| 41. | [76] | Asia | Non-OECD | 2017 | Journal of Industrial Ecology                                                  | Specific appliances (Batteries)                        | electrical (e.g.,      | • Product level assessment<br>• Material level assessment<br>• Circular economy           | Economic, social and environmental | • | • |
| 42. | [77] | Asia | Non-OECD | 2017 | Resource, Conservation and Recycling                                           | Waste Electrical Electronic Equipment (WEEE Directive) | from and (WEEE         | • Consumer behaviour<br>• Geographical level assessment                                   | Social and environmental           |   | • |
| 43. | [78] | Asia | Non-OECD | 2018 | Journal of Cleaner Production                                                  | Various appliances                                     | electrical             | • Product level assessment<br>• Material level assessment<br>• Uncertainty analysis       | Economic, social and environmental | • | • |
| 44. | [14] | Asia | Non-OECD | 2018 | Resource, Conservation and Recycling                                           | Specific appliances (Television)                       | electrical (e.g.,      | • Product level assessment<br>• E-waste management <sup>c</sup><br>• Uncertainty analysis | Economic, social and environmental | • | • |
| 45. | [79] | Asia | Non-OECD | 2018 | Proceedings of the Eleventh International Conference on Management Science and | Waste Electrical Electronic Equipment (WEEE Directive) | from and (WEEE         | • Product level assessment                                                                | Economic and environmental         | • | • |

|     |      |         |          |      |                                                    |                                                        |                   |                                                                                                                                                                              |                                    |  |   |   |
|-----|------|---------|----------|------|----------------------------------------------------|--------------------------------------------------------|-------------------|------------------------------------------------------------------------------------------------------------------------------------------------------------------------------|------------------------------------|--|---|---|
|     |      |         |          |      | Engineering Management                             |                                                        |                   |                                                                                                                                                                              |                                    |  |   |   |
| 46. | [36] | Oceania | OECD     | 2018 | Resource, Conservation and Recycling               | Waste Electrical Electronic Equipment (WEEE Directive) | from and          | <ul style="list-style-type: none"><li>• Geographical level assessment</li><li>• Circular economy</li><li>• Product level assessment</li><li>• Uncertainty analysis</li></ul> | Economic, social and environmental |  | • | • |
| 47. | [81] | Asia    | Non-OECD | 2018 | Journal of Cleaner Production                      | Specific appliances (e.g., Mobile phone)               | electrical (e.g., | <ul style="list-style-type: none"><li>• Geographical level assessment</li><li>• Consume behaviour</li><li>• Uncertainty analysis</li></ul>                                   | Economic, social and environmental |  | • | • |
| 48. | [82] | Europe  | OECD     | 2018 | Resource, Conservation and Recycling               | Waste Electrical Electronic Equipment (WEEE Directive) | from and          | <ul style="list-style-type: none"><li>• Product level assessment</li><li>• Consumer behaviour</li><li>• E-waste management <sup>a</sup></li></ul>                            | Economic, social and environmental |  | • | • |
| 49. | [83] | Oceania | OECD     | 2018 | Journal of Cleaner Production                      | Waste Electrical Electronic Equipment (WEEE Directive) | from and          | <ul style="list-style-type: none"><li>• E-waste management <sup>c</sup></li><li>• Consumer behaviour</li></ul>                                                               | Economic, social and environmental |  | • | • |
| 50. | [31] | Asia    | OECD     | 2018 | Frontiers of Environmental Science and Engineering | Specific appliances (Batteries)                        | electrical (e.g., | <ul style="list-style-type: none"><li>• Consumer behaviour</li><li>• Product level assessment</li><li>• Geographical level assessment</li></ul>                              | Economic, social and environmental |  | • | • |

|     |      |         |          |      |                                                 |                                                        |                    |                                                                                                                                                                                |                                    |   |   |   |
|-----|------|---------|----------|------|-------------------------------------------------|--------------------------------------------------------|--------------------|--------------------------------------------------------------------------------------------------------------------------------------------------------------------------------|------------------------------------|---|---|---|
| 51. | [2]  | America | Non-OECD | 2018 | Resource, Conservation and Recycling            | Specific appliances (e.g., Television)                 | electrical (e.g.,) | <ul style="list-style-type: none"> <li>• Product level assessment</li> <li>• Uncertainty analysis</li> </ul>                                                                   | Economic and environmental         | • |   |   |
| 52. | [84] | Asia    | Non-OECD | 2018 | Sustainability                                  | Various appliances                                     | electrical         | <ul style="list-style-type: none"> <li>• Consumer behaviour</li> <li>• Product level assessment</li> </ul>                                                                     | Social and environmental           | • |   | • |
| 53. | [85] | Asia    | Non-OECD | 2018 | Journal of Material Cycles and Waste Management | Various appliances                                     | electrical         | <ul style="list-style-type: none"> <li>• Consumer behaviour</li> <li>• Product level assessment</li> </ul>                                                                     | Social and environmental           | • |   | • |
| 54. | [86] | Asia    | OECD     | 2018 | Journal of Cleaner Production                   | Various appliances                                     | electrical         | <ul style="list-style-type: none"> <li>• Consumer behaviour</li> <li>• Life cycle analysis</li> <li>• E-waste management<sup>a</sup></li> </ul>                                | Economic, social and environmental |   |   | • |
| 55. | [22] | Europe  | OECD     | 2019 | Resource, Conservation and Recycling            | Waste Electrical Electronic Equipment (WEEE Directive) | from and (WEEE)    | <ul style="list-style-type: none"> <li>• Product level assessment</li> <li>• E-waste management</li> <li>• Material level assessment</li> <li>• Life cycle analysis</li> </ul> | Economic, social and environmental | • |   | • |
| 56. | [87] | Asia    | Non-OECD | 2019 | Journal of Cleaner Production                   | Waste Electrical Electronic Equipment (WEEE Directive) | from and (WEEE)    | <ul style="list-style-type: none"> <li>• Product level assessment</li> <li>• Consumer behaviour</li> <li>• Geographical level assessment</li> </ul>                            | Economic, social and environmental | • | • | • |

|     |      |         |          |      |                                      |                                                        |                   |                                                                                                                                                        |                                    |   |   |   |
|-----|------|---------|----------|------|--------------------------------------|--------------------------------------------------------|-------------------|--------------------------------------------------------------------------------------------------------------------------------------------------------|------------------------------------|---|---|---|
| 57. | [88] | Oceania | OECD     | 2019 | Minerals Engineering                 | Specific appliances (Computer)                         | electrical (e.g., | <ul style="list-style-type: none"><li>• E-waste management</li><li>• Product level assessment</li><li>• Uncertainty analysis</li></ul>                 | Economic, social and environmental |   | • | • |
| 58. | [89] | America | OECD     | 2019 | Resource, Conservation and Recycling | Waste Electrical Electronic Equipment (WEEE Directive) | from and (WEEE    | <ul style="list-style-type: none"><li>• Circular economy</li><li>• Product level assessment</li></ul>                                                  | Economic and environmental         | • | • |   |
| 59. | [12] | Oceania | OECD     | 2019 | Journal of Environmental Management  | Waste Electrical Electronic Equipment (WEEE Directive) | from and (WEEE    | <ul style="list-style-type: none"><li>• Geographical level assessment</li><li>• Product level assessment</li><li>• Material level assessment</li></ul> | Economic, social and environmental | • | • | • |
| 60. | [90] | Asia    | Non-OECD | 2019 | Journal of Cleaner production        | Specific appliances (Batteries)                        | electrical (e.g., | <ul style="list-style-type: none"><li>• Material level assessment</li></ul>                                                                            | Economic and environmental         |   | • |   |
| 61. | [91] | Asia    | Non-OECD | 2019 | Waste Management                     | Waste Electrical Electronic Equipment (WEEE Directive) | from and (WEEE    | <ul style="list-style-type: none"><li>• Consumer behaviour</li></ul>                                                                                   | Social and environmental           |   | • | • |
| 62. | [92] | Asia    | Non-OECD | 2019 | Waste Management and Research        | Technology appliances (CRT LCD)                        | based (e.g.,      | <ul style="list-style-type: none"><li>• Product level assessment</li></ul>                                                                             | Economic and environmental         | • |   | • |
| 63. | [93] | Asia    | Non-OECD | 2019 | Journal of Cleaner Production        | Waste Electrical Electronic Equipment (WEEE Directive) | from and (WEEE    | <ul style="list-style-type: none"><li>• Geographical level assessment</li><li>• Product level assessment</li></ul>                                     | Economic, social and environmental |   |   | • |

|     |      |         |          |      |                                      |                                                        |                   |                                                                                                                                                                                            |                                    |   |   |   |
|-----|------|---------|----------|------|--------------------------------------|--------------------------------------------------------|-------------------|--------------------------------------------------------------------------------------------------------------------------------------------------------------------------------------------|------------------------------------|---|---|---|
|     |      |         |          |      |                                      |                                                        |                   | <ul style="list-style-type: none"> <li>• Life cycle analysis</li> </ul>                                                                                                                    |                                    |   |   |   |
| 64. | [94] | Asia    | Non-OECD | 2019 | Resource, Conservation and Recycling | Specific appliances (Batteries)                        | electrical (e.g., | <ul style="list-style-type: none"> <li>• Geographical level assessment</li> <li>• Product level assessment</li> <li>• Material level assessment</li> <li>• Uncertainty analysis</li> </ul> | Economic, social and environmental | • | • |   |
| 65. | [95] | Asia    | Non-OECD | 2019 | Environmental Science and Technology | Various appliances                                     | electrical        | <ul style="list-style-type: none"> <li>• Product level assessment</li> <li>• Material level assessment</li> <li>• Circular economy</li> </ul>                                              | Economic, social and environmental | • | • |   |
| 66. | [25] | America | OECD     | 2019 | Sustainability                       | Specific appliances (Mobile phone)                     | electrical (e.g., | <ul style="list-style-type: none"> <li>• Consumer behaviour</li> <li>• Circular economy</li> <li>• Product level assessment</li> </ul>                                                     | Economic, social and environmental |   | • |   |
| 67. | [96] | Asia    | OECD     | 2019 | Environmental Engineering Research   | Various appliances                                     | electrical        | <ul style="list-style-type: none"> <li>• Consumer behaviour</li> <li>• E-waste management <sup>b</sup></li> <li>• Product level assessment</li> </ul>                                      | Economic, social and environmental |   | • | • |
| 68. | [40] | Europe  | OECD     | 2019 | Science of the Total Environment     | Waste Electrical Electronic Equipment (WEEE Directive) | from and (WEEE    | <ul style="list-style-type: none"> <li>• Material level assessment</li> <li>• E-waste management <sup>c</sup></li> </ul>                                                                   | Economic, social and environmental |   |   | • |

|     |      |         |          |      |                                      |                                                        |                    |                                                                                                                                                                                             |                                    |                                                   |                                                   |
|-----|------|---------|----------|------|--------------------------------------|--------------------------------------------------------|--------------------|---------------------------------------------------------------------------------------------------------------------------------------------------------------------------------------------|------------------------------------|---------------------------------------------------|---------------------------------------------------|
|     |      |         |          |      |                                      |                                                        |                    | <ul style="list-style-type: none"><li>• Geographical level assessment</li><li>• Life cycle analysis</li></ul>                                                                               |                                    |                                                   |                                                   |
| 69. | [20] | Asia    | Non-OECD | 2020 | Journal of Environmental Management  | Waste Electrical Electronic Equipment (WEEE Directive) | from and (WEEE)    | <ul style="list-style-type: none"><li>• E-waste management <sup>c</sup></li><li>• Geographical level assessment</li><li>• Uncertainty analysis</li></ul>                                    | Economic, social and environmental | <ul style="list-style-type: none"><li>•</li></ul> | <ul style="list-style-type: none"><li>•</li></ul> |
| 70. | [97] | Oceania | OECD     | 2020 | Journal of Cleaner Production        | Waste Electrical Electronic Equipment (WEEE Directive) | from and (WEEE)    | <ul style="list-style-type: none"><li>• Product level assessment</li><li>• E-waste management <sup>c</sup></li><li>• Geographical level assessment</li><li>• Uncertainty analysis</li></ul> | Economic, social and environmental | <ul style="list-style-type: none"><li>•</li></ul> | <ul style="list-style-type: none"><li>•</li></ul> |
| 71. | [98] | Oceania | OECD     | 2020 | Resource, Conservation and Recycling | Waste Electrical Electronic Equipment (WEEE Directive) | from and (WEEE)    | <ul style="list-style-type: none"><li>• Product level assessment</li><li>• Material level assessment</li><li>• Uncertainty analysis</li></ul>                                               | Economic, social and environmental | <ul style="list-style-type: none"><li>•</li></ul> |                                                   |
| 72. | [26] | Oceania | OECD     | 2020 | Journal of Environmental Management  | Specific appliances (e.g., Mobile phone)               | electrical (e.g.,) | <ul style="list-style-type: none"><li>• Consumer behaviour</li><li>• Geographical level assessment</li><li>• Life cycle analysis</li><li>• Circular economy</li></ul>                       | Economic, social and environmental | <ul style="list-style-type: none"><li>•</li></ul> | <ul style="list-style-type: none"><li>•</li></ul> |

|     |       |         |                   |      |                                             |                                                        |                        |                                                                                                                                                                                   |                                    |   |   |   |
|-----|-------|---------|-------------------|------|---------------------------------------------|--------------------------------------------------------|------------------------|-----------------------------------------------------------------------------------------------------------------------------------------------------------------------------------|------------------------------------|---|---|---|
| 73. | [29]  | America | Non-OECD          | 2020 | Journal of Environmental Management         | Specific appliances (e.g., Metal Electrical equipment) | electrical (e.g., form | <ul style="list-style-type: none"> <li>• Material level assessment</li> <li>• Life cycle analysis</li> <li>• Waste management</li> </ul>                                          | Economic, social and environmental | • |   | • |
| 74. | [99]  | Europe  | OECD and Non-OECD | 2020 | Resources, Conservation and Recycling: X    | Waste Electrical Electronic Equipment (WEEE Directive) | from and (WEEE         | <ul style="list-style-type: none"> <li>• Consumer behaviour</li> <li>• Product level assessment</li> <li>• Circular economy</li> <li>• E-waste management <sup>c</sup></li> </ul> | Economic, social and environmental | • | • | • |
| 75. | [100] | America | Non-OECD          | 2020 | Waste Management                            | Various appliances                                     | electrical             | <ul style="list-style-type: none"> <li>• Product level assessment</li> <li>• Consumer behaviour</li> </ul>                                                                        | Economic, social and environmental | • | • | • |
| 76. | [28]  | Europe  | OECD              | 2021 | Environmental Technology and Innovation     | Waste Electrical Electronic Equipment (WEEE Directive) | from and (WEEE         | <ul style="list-style-type: none"> <li>• E-waste management <sup>c</sup></li> <li>• Consumer behaviour</li> <li>• Risk assessment</li> </ul>                                      | Economic, social and environmental |   |   | • |
| 77. | [101] | America | Non-OECD          | 2021 | Technological Forecasting and Social Change | Waste Electrical Electronic Equipment (WEEE Directive) | from and (WEEE         | <ul style="list-style-type: none"> <li>• E-waste management <sup>c</sup></li> <li>• Circular economy</li> </ul>                                                                   | Economic, social and environmental |   |   | • |
| 78. | [15]  | Asia    | Non-OECD          | 2021 | Journal of Cleaner Production               | Waste Electrical Electronic Equipment (WEEE Directive) | from and (WEEE         | <ul style="list-style-type: none"> <li>• Consumer behaviour</li> <li>• Life cycle analysis</li> </ul>                                                                             | Economic, social and environmental | • |   | • |

|     |       |                           |                   |      |                                      |                                                        |                    |                                                                                                                                                            |                                    |   |   |
|-----|-------|---------------------------|-------------------|------|--------------------------------------|--------------------------------------------------------|--------------------|------------------------------------------------------------------------------------------------------------------------------------------------------------|------------------------------------|---|---|
| 79. | [1]   | America                   | OECD              | 2021 | Resource, Conservation and Recycling | Waste Electrical Electronic Equipment (WEEE Directive) | from and (WEEE)    | <ul style="list-style-type: none"> <li>• Geographical level assessment</li> <li>• Consumer behaviour</li> <li>• Uncertainty analysis</li> </ul>            | Economic, social and environmental | • | • |
| 80. | [102] | America                   | OECD              | 2021 | Journal of Industrial Ecology        | Various appliances                                     | electrical         | <ul style="list-style-type: none"> <li>• Consumer behaviour</li> <li>• Uncertainty analysis</li> </ul>                                                     | Economic, social and environmental | • | • |
| 81. | [135] | America                   | OECD              | 2021 | Journal of Cleaner Production        | Waste Electrical Electronic Equipment (WEEE Directive) | from and (WEEE)    | <ul style="list-style-type: none"> <li>• Geographical level assessment</li> <li>• E-waste management <sup>c</sup></li> <li>• Circular economy</li> </ul>   | Economic, social and environmental | • |   |
| 82. | [103] | America                   | Non-OECD          | 2021 | Resource, Conservation and Recycling | Various appliances                                     | electrical         | <ul style="list-style-type: none"> <li>• Product level assessment</li> <li>• Geographical level assessment</li> <li>• Circular economy</li> </ul>          | Economic, social and environmental | • |   |
| 83. | [3]   | America<br>Europe<br>Asia | OECD and Non-OECD | 2021 | Journal of Hazardous material        | Waste Electrical Electronic Equipment (WEEE Directive) | from and (WEEE)    | <ul style="list-style-type: none"> <li>• Geographical level assessment</li> <li>• Consumer behaviour</li> <li>• E-waste management <sup>a</sup></li> </ul> | Economic, social and environmental |   | • |
| 84. | [104] | Asia                      | Non-OECD          | 2021 | Waste Management                     | Specific appliances (e.g., Mobile phone)               | electrical (e.g.,) | <ul style="list-style-type: none"> <li>• Material level assessment</li> <li>• Uncertainty analysis</li> </ul>                                              | Economic and environmental         | • | • |

|     |       |         |          |      |                                              |                                                            |                           |                                                                                                                                                     |                                    |   |   |
|-----|-------|---------|----------|------|----------------------------------------------|------------------------------------------------------------|---------------------------|-----------------------------------------------------------------------------------------------------------------------------------------------------|------------------------------------|---|---|
| 85. | [8]   | Europe  | OECD     | 2021 | Resource, Conservation and Recycling         | Various appliances                                         | electrical                | <ul style="list-style-type: none"> <li>• Product level assessment</li> <li>• Geographical level assessment</li> <li>• Consumer behaviour</li> </ul> | Economic, social and environmental | • | • |
| 86. | [23]  | Europe  | OECD     | 2021 | Sustainability                               | Waste Electrical and Electronic Equipment (WEEE Directive) | from and (WEEE Directive) | <ul style="list-style-type: none"> <li>• Product level assessment</li> <li>• Material level assessment</li> </ul>                                   | Economic and environmental         | • | • |
| 87. | [105] | Europe  | Non-OECD | 2021 | Journal of Ecological Engineering            | Waste Electrical and Electronic Equipment (WEEE Directive) | from and (WEEE Directive) | <ul style="list-style-type: none"> <li>• Product level assessment</li> <li>• Material level assessment</li> </ul>                                   | Economic and environmental         | • | • |
| 88. | [106] | Asia    | Non-OECD | 2021 | Journal of Cleaner Production                | Specific appliances (e.g., Mobile phone)                   | electrical (e.g.,)        | <ul style="list-style-type: none"> <li>• Product level assessment</li> <li>• Consumer behaviour</li> <li>• Micro level estimation</li> </ul>        | Economic, social and environmental | • | • |
| 89. | [107] | America | OECD     | 2021 | Journal of Cleaner production                | Specific appliances (e.g., Refrigerator)                   | electrical (e.g.,)        | <ul style="list-style-type: none"> <li>• Environmental impact assessment</li> <li>• Product level assessment</li> <li>• End-Of-Life</li> </ul>      | Economic, social and environmental | • | • |
| 90. | [108] | Africa  | Non-OECD | 2021 | International Journal of Engineering Applied | Various appliances                                         | electrical                | <ul style="list-style-type: none"> <li>• E-waste management <sup>a</sup></li> <li>• Product level assessment</li> </ul>                             | Economic, social and environmental | • | • |

|     |       |                            |                          |      |                                     |                                                                       |                                       |                                                                                                                                                                   |                                          |   |   |   |
|-----|-------|----------------------------|--------------------------|------|-------------------------------------|-----------------------------------------------------------------------|---------------------------------------|-------------------------------------------------------------------------------------------------------------------------------------------------------------------|------------------------------------------|---|---|---|
|     |       |                            |                          |      | Sciences and Technology             |                                                                       |                                       | <ul style="list-style-type: none"> <li>• Consumer behaviour</li> </ul>                                                                                            |                                          |   |   |   |
| 91. | [109] | Europe<br>America<br>China | OECD<br>and Non-<br>OECD | 2021 | Waste<br>Management                 | Various<br>appliances                                                 | electrical                            | <ul style="list-style-type: none"> <li>• Material level assessment</li> <li>• Cost benefit analysis</li> <li>• Life cycle analysis</li> </ul>                     | Economic,<br>social and<br>environmental | • |   | • |
| 92. | [7]   | Asia                       | Non-<br>OECD             | 2021 | Toxic                               | Specific<br>appliances<br>(e.g.,<br>Mobile Phone)                     | electrical<br>(e.g.,<br>Mobile Phone) | <ul style="list-style-type: none"> <li>• Consumer behaviour</li> <li>• Material level assessment</li> <li>• E-waste management <sup>a</sup></li> </ul>            | Economic,<br>social and<br>environmental | • |   | • |
| 93. | [110] | Asia                       | Non-<br>OECD             | 2021 | Resources<br>policy                 | Various<br>appliances                                                 | electrical                            | <ul style="list-style-type: none"> <li>• Material level assessment</li> <li>• Circular economy</li> <li>• E-waste management <sup>a</sup></li> </ul>              | Economic,<br>social and<br>environmental | • |   | • |
| 94. | [111] | Asia                       | Non-<br>OECD             | 2021 | Journal of<br>Cleaner<br>Production | Waste<br>Electrical<br>Electronic<br>Equipment<br>(WEEE<br>Directive) | from<br>and<br>(WEEE<br>Directive)    | <ul style="list-style-type: none"> <li>• Geographical level assessment</li> <li>• E-waste management <sup>c</sup></li> <li>• Input and output analysis</li> </ul> | Economic,<br>social and<br>environmental | • | • | • |
| 95. | [112] | Europe                     | OECD<br>and Non-<br>OECD | 2021 | Waste<br>Management<br>and Research | Waste<br>Electrical<br>Electronic<br>Equipment<br>(WEEE<br>Directive) | from<br>and<br>(WEEE<br>Directive)    | <ul style="list-style-type: none"> <li>• Product level assessment</li> <li>• E-waste management <sup>b</sup></li> <li>• Geographical level assessment</li> </ul>  | Economic,<br>social and<br>environmental | • | • | • |

|      |       |                                      |                   |      |                                     |                                                        |                                  |                                                                                                                                                                                                |                                    |   |   |   |   |
|------|-------|--------------------------------------|-------------------|------|-------------------------------------|--------------------------------------------------------|----------------------------------|------------------------------------------------------------------------------------------------------------------------------------------------------------------------------------------------|------------------------------------|---|---|---|---|
|      |       |                                      |                   |      |                                     |                                                        |                                  | <ul style="list-style-type: none"> <li>• Circular economy</li> </ul>                                                                                                                           |                                    |   |   |   |   |
| 96.  | [5]   | Oceania                              | OECD              | 2021 | Metals                              | Specific appliances (e.g., Printed board)              | electrical (e.g., circuit board) | <ul style="list-style-type: none"> <li>• Material level assessment</li> <li>• Geographical level assessment</li> <li>• E-waste management <sup>a</sup></li> </ul>                              | Economic, social and environmental | • | • | • |   |
| 97.  | [113] | Asia<br>Europe<br>America<br>Oceania | OECD and Non-OECD | 2022 | Sustainability                      | Waste Electrical Electronic Equipment (WEEE Directive) | from and (WEEE)                  | <ul style="list-style-type: none"> <li>• Product level assessment</li> <li>• E-waste management <sup>b</sup></li> <li>• Circular economy</li> </ul>                                            | Economic, social and environmental | • |   | • |   |
| 98.  | [27]  | Europe                               | Non-OECD          | 2022 | Energies                            | Waste Electrical Electronic Equipment (WEEE Directive) | from and (WEEE)                  | <ul style="list-style-type: none"> <li>• Product level assessment</li> <li>• Circular economy</li> <li>• E-waste management <sup>c</sup></li> </ul>                                            | Economic, social and environmental |   |   |   | • |
| 99.  | [114] | Asia                                 | Non-OECD          | 2022 | Heliyon                             | Various appliances                                     | electrical                       | <ul style="list-style-type: none"> <li>• Environmental impact assessment</li> <li>• E-waste management <sup>c</sup></li> <li>• Circular economy</li> <li>• Product level assessment</li> </ul> | Economic, social and environmental |   | • | • |   |
| 100. | [115] | Europe                               | OECD              | 2022 | The Journal of Research on Brussels | Waste Electrical Electronic                            | from and                         | <ul style="list-style-type: none"> <li>• E-waste management <sup>c</sup></li> </ul>                                                                                                            | Economic, social and environmental | • |   | • |   |

|      |       |         |                   |      |                                                | Equipment (WEEE Directive) |            |                                                                                                                                                                                            |                                    |   |   |   |
|------|-------|---------|-------------------|------|------------------------------------------------|----------------------------|------------|--------------------------------------------------------------------------------------------------------------------------------------------------------------------------------------------|------------------------------------|---|---|---|
| 101. | [116] |         | OECD and Non-OECD | 2022 | Journal of Engineering                         | Various appliances         | electrical | <ul style="list-style-type: none"><li>• Material level assessment</li><li>• Life cycle analysis</li><li>• E-waste management <sup>c</sup></li></ul>                                        | Economic, social and environmental | • |   | • |
| 102. | [117] | Asia    | Non-OECD          | 2022 | Business Strategy and The Environment          | Various appliances         | electrical | <ul style="list-style-type: none"><li>• E-waste management <sup>c</sup></li><li>• Consumer behaviour</li><li>• Product level assessment</li></ul>                                          | Economic, social and environmental | • |   | • |
| 103. | [118] | America | OECD              | 2022 | Resources, Conservation and Recycling Advances | Various appliances         | electrical | <ul style="list-style-type: none"><li>• E-waste management <sup>a</sup></li><li>• Product level assessment</li></ul>                                                                       | Economic, social and environmental | • |   | • |
| 104. | [13]  | Asia    | Non-OECD          | 2022 | Resource, Conservation and Recycling           | Various appliances         | electrical | <ul style="list-style-type: none"><li>• Product level assessment</li><li>• Geographical level assessment</li><li>• Life cycle analysis</li><li>• Environmental impact assessment</li></ul> | Economic, social and environmental | • | • | • |
| 105. | [119] |         | OECD              | 2022 | Resource, Conservation and Recycling           | Various appliances         | electrical | <ul style="list-style-type: none"><li>• Geographical level assessment</li><li>• E-waste management <sup>b</sup></li><li>• Life cycle analysis</li></ul>                                    | Economic, social and environmental | • |   | • |

|      |       |         |          |      |                                              |                                          |            |                                                                                                                                                                                                |                                    |   |   |   |
|------|-------|---------|----------|------|----------------------------------------------|------------------------------------------|------------|------------------------------------------------------------------------------------------------------------------------------------------------------------------------------------------------|------------------------------------|---|---|---|
|      |       |         |          |      |                                              |                                          |            | <ul style="list-style-type: none"> <li>• Product level assessment</li> </ul>                                                                                                                   |                                    |   |   |   |
| 106. | [120] | America | OECD     | 2022 | Resource, Environment and Sustainability     | Technology appliances (e.g., CRT LCD)    | based      | <ul style="list-style-type: none"> <li>• Product level assessment</li> <li>• Material level assessment</li> <li>• Circular economy</li> <li>• Life cycle analysis</li> </ul>                   | Economic, social and environmental | • | • | • |
| 107. | [21]  | America | Non-OECD | 2022 | Environmental Technology and Innovation      | Various appliances                       | electrical | <ul style="list-style-type: none"> <li>• Product level assessment</li> <li>• Geographical level assessment</li> <li>• Consumer behaviour</li> <li>• E-waste management <sup>c</sup></li> </ul> | Economic, social and environmental | • | • | • |
| 108. | [122] | Asia    | Non-OECD | 2022 | Environmental Science and Pollution Research | Specific appliances (e.g., Mobile Phone) | electrical | <ul style="list-style-type: none"> <li>• Product level assessment</li> <li>• Material level assessment</li> <li>• E-waste policy</li> </ul>                                                    | Economic, social and environmental | • | • | • |
| 109. | [123] | Asia    | Non-OECD | 2022 | Total Environment Research Themes            | Various appliances                       | electrical | <ul style="list-style-type: none"> <li>• Circular economy</li> <li>• Product level assessment</li> <li>• Environmental impact assessment</li> </ul>                                            | Economic, social and environmental | • |   | • |
| 110. | [124] | America | Non-OECD | 2022 | Environmental Technology and Innovation      | Various appliances                       | electrical | <ul style="list-style-type: none"> <li>• Circular economy</li> </ul>                                                                                                                           | Economic, social and environmental | • |   | • |

|      |       |         |          |      |                                      |                                                            |          |                                                                                                                                                       |                                    |   |   |   |  |
|------|-------|---------|----------|------|--------------------------------------|------------------------------------------------------------|----------|-------------------------------------------------------------------------------------------------------------------------------------------------------|------------------------------------|---|---|---|--|
|      |       |         |          |      |                                      |                                                            |          | <ul style="list-style-type: none"> <li>• Reverse logistics model</li> <li>• E-waste management <sup>c</sup></li> </ul>                                |                                    |   |   |   |  |
| 111. | [125] | Europe  | OECD     | 2022 | Resource, Conservation and Recycling | Specific electrical appliances (e.g., EV battery)          |          | <ul style="list-style-type: none"> <li>• Circular economy</li> <li>• End-of-life</li> <li>• Product level assessment</li> </ul>                       | Economic, social and environmental | • |   | • |  |
| 112. | [126] | Africa  | Non-OECD | 2022 | Sustainable Environment              | Waste Electrical and Electronic Equipment (WEEE Directive) | from and | <ul style="list-style-type: none"> <li>• Consumer behaviour</li> <li>• E-waste management <sup>c</sup></li> <li>• Product level assessment</li> </ul> | Economic, social and environmental | • |   | • |  |
| 113. | [127] | Europe  | Non-OECD | 2022 | Journal of Environmental Management  | Specific electrical appliances (e.g., Mobile Phone)        |          | <ul style="list-style-type: none"> <li>• Material level assessment</li> <li>• Circular economy</li> </ul>                                             | Economic, social and environmental | • | • | • |  |
| 114. | [6]   | Europe  | OECD     | 2022 | Applied Sciences                     | Specific electrical appliances (e.g., EV Battery)          |          | <ul style="list-style-type: none"> <li>• Material level assessment</li> <li>• Circular economy</li> </ul>                                             | Economic, social and environmental | • |   | • |  |
| 115. | [128] | America | Non-OECD | 2022 | Cleaner Waste System                 | Various electrical appliances                              |          | <ul style="list-style-type: none"> <li>• Geographical level assessment</li> <li>• Product level assessment</li> <li>• E-waste management</li> </ul>   | Economic, social and environmental | • |   | • |  |

Note ;

- E-waste management <sup>a</sup> (Disposal) , E-waste management <sup>b</sup> (Treatment) , E-waste management <sup>c</sup> (All aspects)

- MFA application in e-waste management: M1 (E-waste generation), M2 (E-waste stocks), M3 (E-waste flow)

**Table S2.**

Waste from Electrical and Electronic Equipment (WEEE directive)

| No  | Categories                                 | Example                                                     |
|-----|--------------------------------------------|-------------------------------------------------------------|
| 1.  | Large Household Appliances                 | Washing Machines, Dishwashing Machines, Refrigerators       |
| 2.  | Small Household Appliances                 | Radio, Toaster, Vacuum Equipment                            |
| 3.  | IT and Telecommunication Equipment         | Telephones, Printers, Personal Computers                    |
| 4.  | Consumer Equipment and Photovoltaic Panels | Water Pumps, Solar Panels                                   |
| 5.  | Light Equipment                            | LED Lamps, Fluorescent Lamps, High Discharge Lamps          |
| 6.  | Electrical and Electronic Tools            | Industrial Large Scale Electronic Equipment; Large Printers |
| 7.  | Toys, Leisure, and Sport Equipment         | Coin Slot Machines, Video-Games Consoles,                   |
| 8.  | Medical Devices                            | Cardiac Defibrillators, High-Frequency Surgical Equipment.  |
| 9.  | Monitoring and Control Instruments         | Smoke Detectors, Thermostats,                               |
| 10. | Automatic Dispensers                       | Hand Soap Dispenser, Sanitizer Dispenser                    |
